# Supplementary material
Source: publisher figshare collection journal article supplement (https://acs.figshare.com/ndownloader/files/4079107)
Supplement: Supplementary file 1 [file 4079107]

88
Methyl pyruvate form 3 on Pd(111) (in Ang)
H         14.52378        6.11263        8.30732
H         13.34915        7.02409        9.33778
H         13.85856        7.69536        7.75012
H          9.35644        7.40779        7.28450
H         11.27287        3.95176        6.90745
H          9.44920        4.00070        7.14043
C         10.38776        5.89812        6.74600
C         11.43994        6.67109        7.49170
C         13.65156        6.77363        8.31239
C         10.32960        4.44917        6.65664
O          9.14608        6.50309        6.92827
O         11.17941        7.78582        7.94997
O         12.60305        6.01965        7.65186
Pd         0.00000        0.00000        0.00000
Pd         1.40000        2.42487        0.00000
Pd         2.80000        4.84974        0.00000
Pd         4.20000        7.27461        0.00000
Pd         5.60000        9.69948        0.00000
Pd         2.80000        0.00000        0.00000
Pd         4.20000        2.42487        0.00000
Pd         5.60000        4.84974        0.00000
Pd         7.00000        7.27461        0.00000
Pd         8.40000        9.69948        0.00000
Pd         5.60000        0.00000        0.00000
Pd         7.00000        2.42487        0.00000
Pd         8.40000        4.84974        0.00000
Pd         9.80000        7.27461        0.00000
Pd        11.20000        9.69948        0.00000
Pd         8.40000        0.00000        0.00000
Pd         9.80000        2.42487        0.00000
Pd        11.20000        4.84974        0.00000
Pd        12.60000        7.27461        0.00000
Pd        14.00000        9.69948        0.00000
Pd        11.20000        0.00000        0.00000
Pd        12.60000        2.42487        0.00000
Pd        14.00000        4.84974        0.00000
Pd        15.40000        7.27461        0.00000
Pd        16.80000        9.69948        0.00000
Pd         1.39576        0.80803        2.28106
Pd         2.78877        3.22795        2.28263
Pd         4.18357        5.64893        2.28305
Pd         5.57773        8.08022        2.28404
Pd         6.99160       10.50906        2.28047
Pd         4.19648        0.80334        2.28321
Pd         5.59564        3.23040        2.28036
Pd         6.99172        5.66173        2.29210
Pd         8.37895        8.08080        2.28093
Pd         9.79290       10.49887        2.27382
Pd         6.99211        0.80674        2.28227
Pd         8.40679        3.23840        2.31502
Pd         9.78314        5.64981        2.30491
Pd        11.18088        8.04500        2.32685
Pd        12.58448       10.49177        2.28335
Pd         9.78930        0.79454        2.28091
Pd        11.18295        3.22355        2.28526
Pd        12.56609        5.65746        2.30383
Pd        13.98629        8.07644        2.28144
Pd        15.38809       10.49945        2.28355
Pd        12.59354        0.80017        2.27993
Pd        13.99067        3.22936        2.27736
Pd        15.38171        5.65342        2.28090
Pd        16.78622        8.07625        2.28743
Pd        18.18811       10.49807        2.28808
Pd         2.78646        1.60643        4.57121
Pd         4.17540        4.02680        4.57037
Pd         5.54886        6.46031        4.56385
Pd         6.95397        8.89911        4.55637
Pd         8.37968       11.31547        4.56471
Pd         5.57932        1.60321        4.56965
Pd         6.96754        4.01767        4.55674
Pd         8.32932        6.47762        4.58714
Pd         9.76994        8.91413        4.54699
Pd        11.18164       11.30928        4.56605
Pd         8.37874        1.58913        4.56283
Pd         9.81332        4.00082        4.66941
Pd        11.11714        6.42666        4.75057
Pd        12.57285        8.87489        4.56968
Pd        13.97649       11.30008        4.56227
Pd        11.19145        1.57652        4.55520
Pd        12.61385        4.00331        4.53587
Pd        13.96924        6.45094        4.55257
Pd        15.36651        8.87550        4.57358
Pd        16.77150       11.29476        4.57408
Pd        13.99181        1.59254        4.56381
Pd        15.38797        4.03168        4.56495
Pd        16.76867        6.45548        4.56976
Pd        18.15845        8.88060        4.58506
Pd        19.57226       11.29839        4.56976
